# Supplementary material
Source: publisher site journal article supplement (https://www.dovepress.com/article/404823)
Supplement: Supplementary file 1 [file get_supplementary_file.php]

**Appendix (Supplemental table)**

**Supplemental Table 1**

Medical codes to identify central venous catheters

| **Code** | **Description** | **Category** | **Measure** |
| --- | --- | --- | --- |
| 36555 | INSRT NON-TUNNL CNTRL CVC; <5 YR | CPT | Central Venous Catheter |
| 36556 | INSRT NON-TUNNL CNTRL CVC; 5/> | CPT | Central Venous Catheter |
| 36557 | INSRT TUNNL CVC NO PORT/PUMP;<5 YR | CPT | Central Venous Catheter |
| 36558 | INSRT TUNNL CVC NO PORT/PUMP;5 YR/> | CPT | Central Venous Catheter |
| 36560 | INSRT TUNNL CNTRL CVAD PORT; <5 YR | CPT | Central Venous Catheter |
| 36561 | INSRT TUNNL CNTRL CVAD PORT; 5 YR/> | CPT | Central Venous Catheter |
| 36563 | INSRT TUNNL CNTRL CVAD W/SUBQ PUMP | CPT | Central Venous Catheter |
| 36565 | INSRT TUNL CVAD 2 CATH-SITE; NO PORT | CPT | Central Venous Catheter |
| 36566 | INSRT TUNNL CVAD 2 CATH-2 SITE; PORT | CPT | Central Venous Catheter |
| 36570 | INSRT PERIPH INSRT CVAD W/PORT;<5YR | CPT | Central Venous Catheter |
| 36571 | INSRT PERIPH INSRT CVAD PORT; 5YR/> | CPT | Central Venous Catheter |
| 36575 | REP CV ACSS CATH W/O PORT/PUMP | CPT | Central Venous Catheter |
| 36576 | REP CVAD W/PORT/PUMP CNTRL/PERIPH | CPT | Central Venous Catheter |
| 36578 | REPL CATH ONLY CVAD SUBQ PORT/PUMP | CPT | Central Venous Catheter |
| 36580 | REPL NON-TUNNLD CVC W/O PORT/PUMP | CPT | Central Venous Catheter |
| 36581 | REPL TUNNLD CNTRL CVC W/O PORT/PUMP | CPT | Central Venous Catheter |
| 36582 | REPL TUNNLD CNTRL CVAD W/SUBQ PORT | CPT | Central Venous Catheter |
| 36583 | REPL TUNNLD CNTRL CVAD W/SUBQ PUMP | CPT | Central Venous Catheter |
| 36585 | REPL PERIPH INSRT CVAD W/SUBQ PORT | CPT | Central Venous Catheter |
| 36589 | REMV TUNNLD CVC W/O SUBQ PORT/PUMP | CPT | Central Venous Catheter |
| 36590 | REMV TUNNLD CVAD W/SUBQ PORT/PUMP | CPT | Central Venous Catheter |
| 36597 | REPSTN PREV PLCD CVC FLUORO GUID | CPT | Central Venous Catheter |
| 36598 | INJ W/FLUOR EVAL CV DEVICE | CPT | Central Venous Catheter |
| C1750 | CATHETER HEMODIALYSIS LONG-TERM | CPT | Central Venous Catheter |
| C1752 | CATHETER HEMODIALYSIS SHORT-TERM | CPT | Central Venous Catheter |
| 36568 | INSERT PICC W/O PORT/PUMP; < 5 YR | CPT | Central Venous Catheter |
| 36569 | INSERT PICC W/O PORT/PUMP; 5 YR/> | CPT | Central Venous Catheter |
| 36584 | REPL PICC W/O PORT/PUMP SAME ACSS | CPT | Central Venous Catheter |

**Abbreviations:** CPT, Current Procedural Terminology
